# Supplementary material for: A new insight into the reversal of multidrug resistance in cancer by nanodrugs
Source: Royal Society of Chemistry journal article supplement (doi:10.1039/c9bm00355j), 2019-01-01
Supplement: c9bm00355j1.pdf [file c9bm00355j1.pdf]

## **Supporting Information**

### **A New Insight into the Reversal of Multidrug Resistance in Cancer by Polymeric Nanodrug**

Huangyong Jiang, Dong Chen, Dongbo Guo, Yan Wu, Xin Jin\* and  
Xinyuan Zhu

School of Chemistry and Chemical Engineering, State Key Laboratory of Metal Matrix  
Composites, Shanghai Jiao Tong University, 800 Dongchuan Road, Shanghai 200240,  
P. R. China. E-mail: jxcindy@sjtu.edu.cn

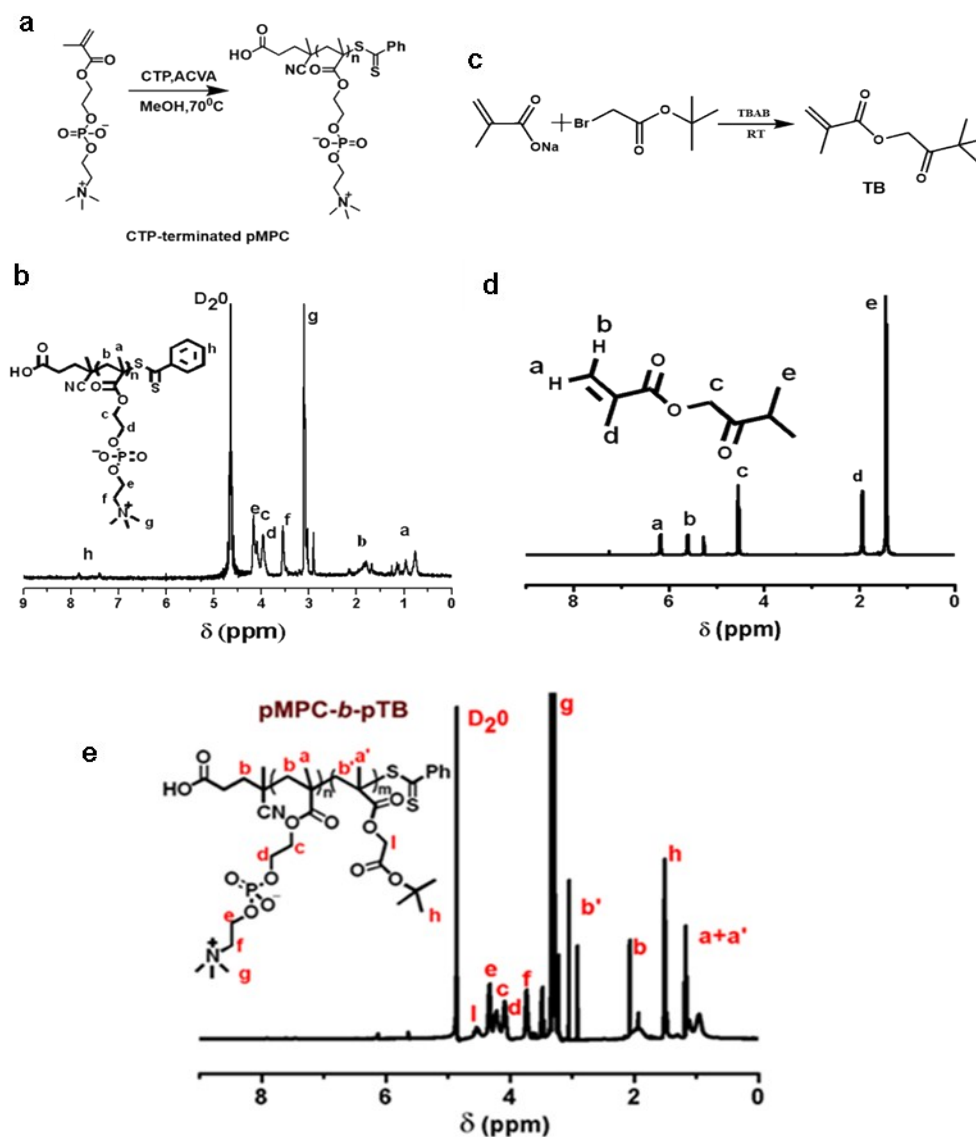

**Figure S1:** (a) Synthesis of macroRAFT agent (CTP-terminated pMPC). (b)  $^1\text{H}$  NMR spectrum of CTP-terminated pMPC in  $\text{D}_2\text{O}$ . (c) Synthesis of monomer TB. (d)  $^1\text{H}$  NMR spectrum of monomer TB in  $\text{CDCl}_3$ . (e)  $^1\text{H}$  NMR spectrum of CTP-terminated pMPC-*b*-pTB (BP) in  $\text{D}_2\text{O}$ .

**Table S1.** pMPC-*b*-pTB and the corresponding acyl hydrazide polymer

| Polymer    | Mw<br>(KDa) <sup>a</sup> | PDI <sup>b</sup> | TBOEMA<br>(mol %) <sup>c</sup> | Polymer     | Mw<br>(KDa) | PDI | Hydrazine<br>(mol %) <sup>d</sup> |
|------------|--------------------------|------------------|--------------------------------|-------------|-------------|-----|-----------------------------------|
| <b>BP1</b> | 11                       | 1.4              | 12%                            | <b>BPN1</b> | 11          | 1.4 | 10%                               |
| <b>BP2</b> | 13                       | 1.6              | 22%                            | <b>BPN2</b> | 12          | 1.7 | 21%                               |
| <b>BP3</b> | 14                       | 1.5              | 30%                            | <b>BPN3</b> | 14          | 1.4 | 28%                               |

<sup>a</sup>Molecular weight measured by GPC. <sup>b</sup>PDI measured by GPC. <sup>c</sup>Estimated by <sup>1</sup>H NMR spectroscopy. <sup>d</sup>Estimated by <sup>1</sup>H NMR spectroscopy.

**Table S2.** Characterization of DOX-BP NPs.

| samples        | CMC<br>values<br>(mg/mL) | DOX (wt<br>%) <sup>a</sup> | Size<br>(DLS, nm) <sup>b</sup> | Size<br>(TEM, nm) <sup>c</sup> | Zeta<br>(mV) <sup>d</sup> |
|----------------|--------------------------|----------------------------|--------------------------------|--------------------------------|---------------------------|
| <b>DOX-BP1</b> | 9.38×10 <sup>-3</sup>    | 10                         | ~46                            | ~33                            | 0.02                      |
| <b>DOX-BP2</b> | 1.18×10 <sup>-2</sup>    | 14                         | ~136                           | ~101                           | -0.01                     |
| <b>DOX-BP3</b> | 1.35×10 <sup>-2</sup>    | 15                         | ~225                           | ~191                           | 0.03                      |

<sup>a</sup>DOX loading is obtained by UV-vis spectroscopy at 488 nm. <sup>b</sup>Hydrodynamic diameter measured in water by DLS. <sup>c</sup>Nanoparticles sizes measured by TEM. <sup>d</sup>Zeta potential measured in water by Zetasizer.

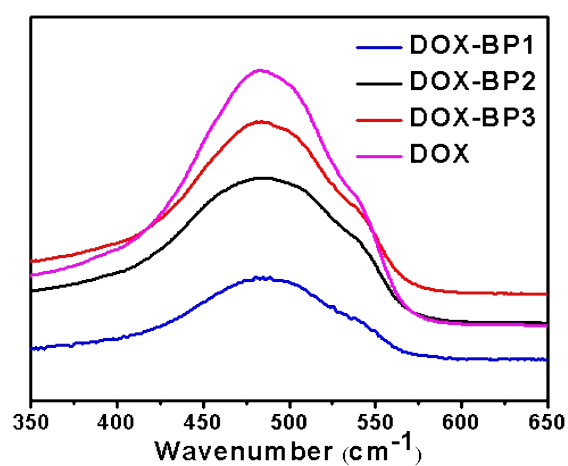

**Figure S2:** UV-vis spectrum of DOX-BP1, DOX-BP2, DOX-BP3 and DOX hydrochloride in water.

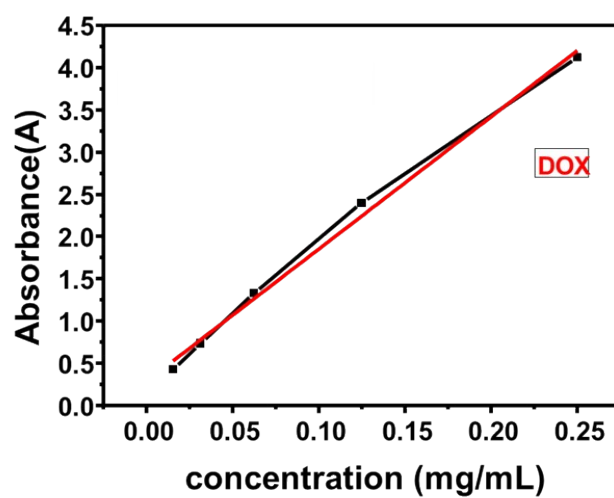

**Figure S3:** The standard curve of DOX hydrochloride in water at 480 nm.

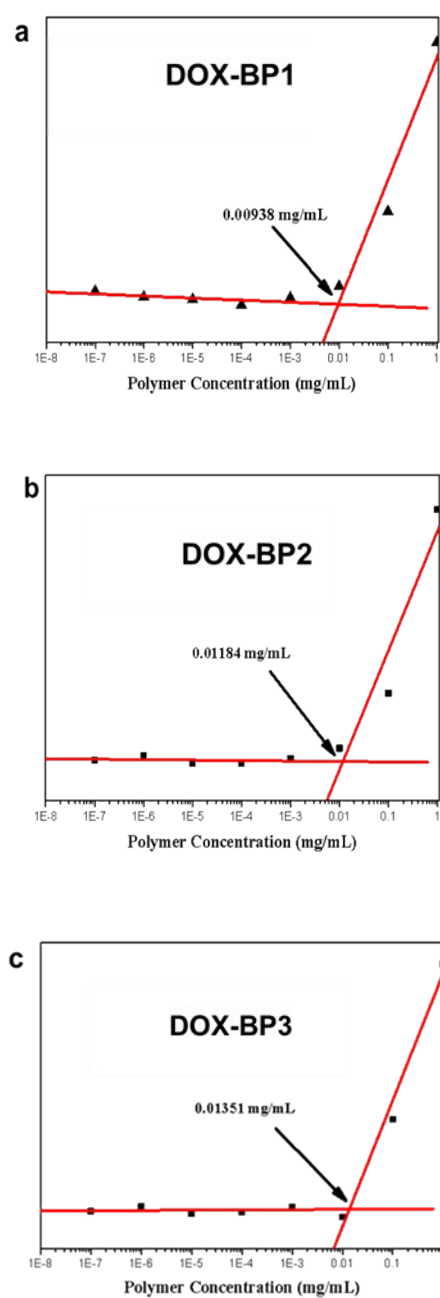

**Figure S4:** Emission intensity ( $\lambda = 385$  nm) of Pyrene in an aqueous solution of a) DOX-BP1, b) DOX-BP2 and c) DOX-BP3 with various concentrations.

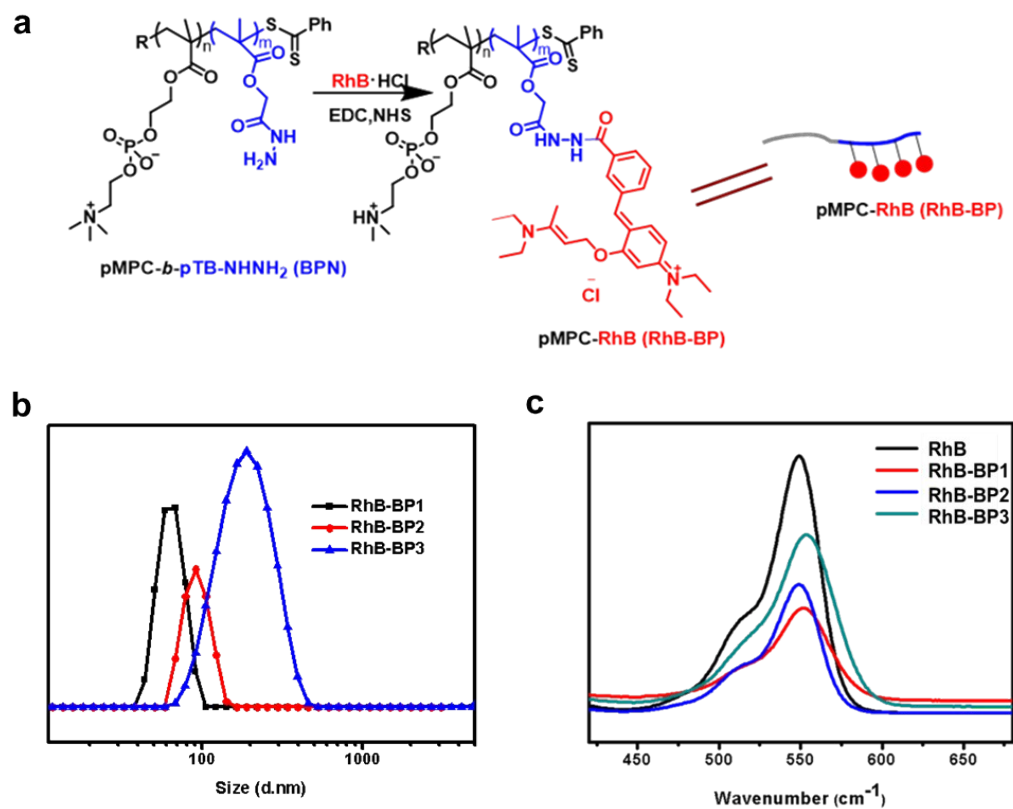

**Figure S5:** (a) Synthesis route of pMPC-RhB (RhB-BP). (b) DLS curves of RhB-BP1 (black line), RhB-BP2 (red line) and RhB-BP3 (blue line). (c) UV-vis spectrum of RhB-BP1 (red line), RhB -BP2 (blue line), RhB -BP3 (cyan line) and RhB hydrochloride (black line) in water.

**Table S3.** Characterization of RhB-BP NPs.

| samples        | RhB (wt %) <sup>a</sup> | Size (nm) <sup>b</sup> | Zeta (mV) <sup>c</sup> |
|----------------|-------------------------|------------------------|------------------------|
| <b>RhB-BP1</b> | 12%                     | ~64                    | -0.1                   |
| <b>RhB-BP2</b> | 16%                     | ~98                    | -0.2                   |
| <b>RhB-BP3</b> | 19%                     | ~200                   | 0.05                   |

<sup>a</sup>RhB loading is obtained by UV–vis spectroscopy at 488 nm. <sup>b</sup>Hydrodynamic diameter measured in water by DLS. <sup>c</sup>Zeta potential measured in water by Zetasizer.

---

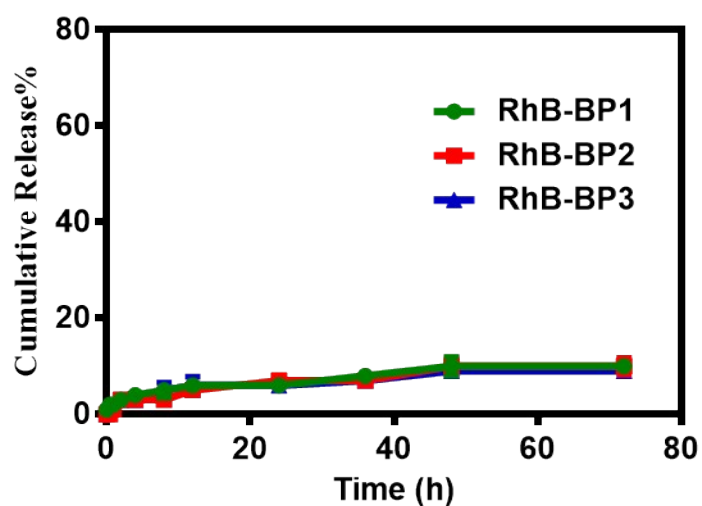

**Figure S6:** In vitro release curve of RhB from different RhB-BP NPs under pH=5.0 value (RhB-BP1: green line; RhB-BP2: red line; RhB-BP3: blue line).

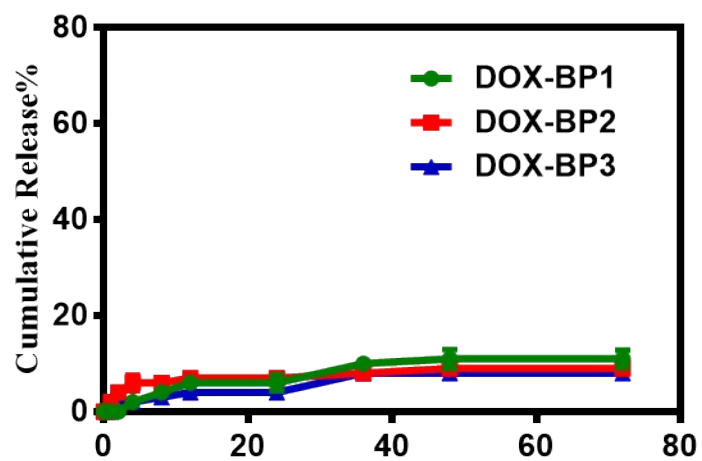

**Figure S7:** In vitro release curve of DOX from different sizes DOX-BP NPs under pH=7.4 value (DOX-BP1: green line; DOX-BP2: red line; DOX-BP3: blue line).

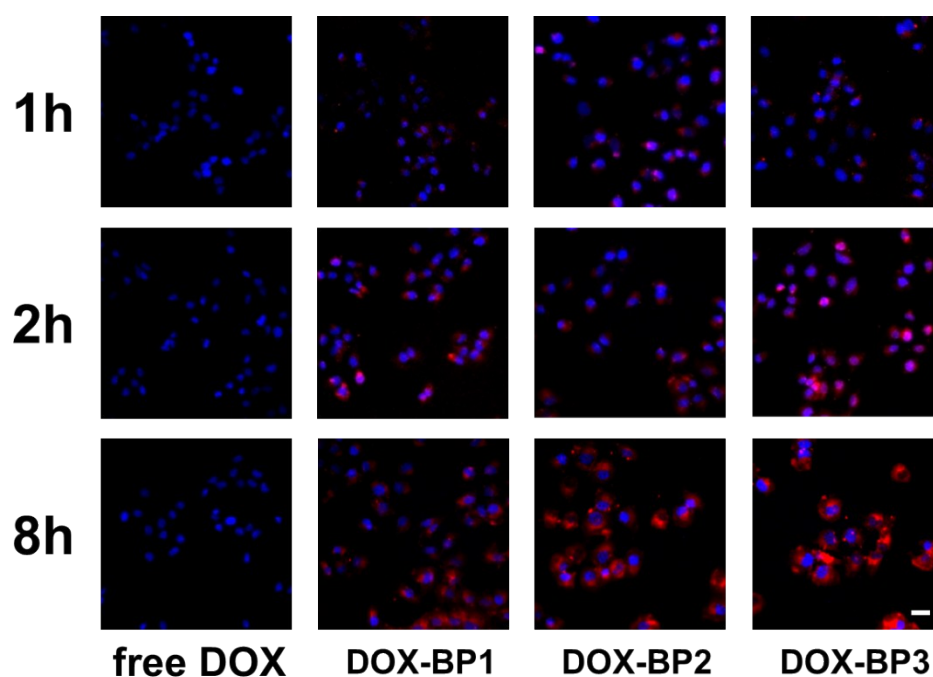

**Figure S8:** Fluorescence images of MCF-7/ADR cells incubated with free DOX, DOX-BP1, DOX-BP2 and DOX-BP3 for 1h, 2h and 8 h. Scale bars: 30  $\mu\text{m}$ . All cells incubated with samples at a same DOX concentration (10  $\mu\text{g/mL}$ ).

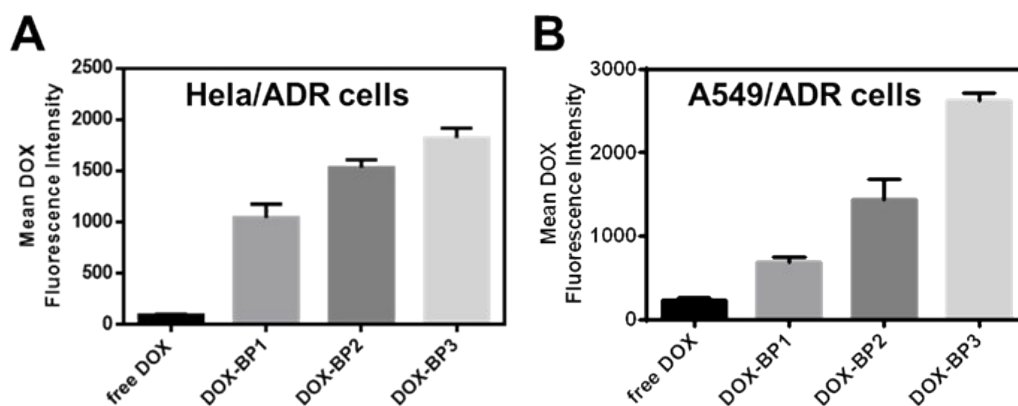

**Figure S9.** Fluorescence intensity in HeLa/ADR cells (A) and A549/ADR cells (B) after treatment free DOX and varisized DOX-BP NPs for 8 h. All cells incubated with samples at a same substrate concentration (DOX= 10  $\mu\text{g/mL}$ ).

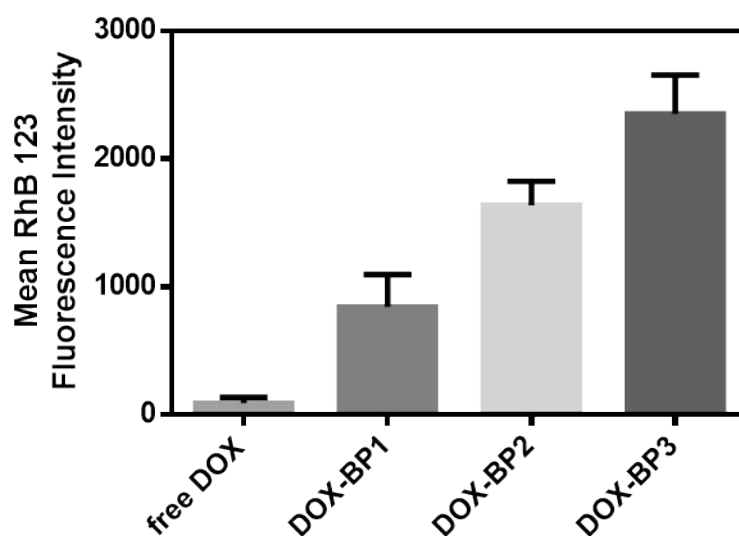

Figure S10. Corresponding fluorescence intensity in MCF-7/ADR cells after co-incubated with RhB123&free DOX or RhB123&different sizes DOX-BP NPs for 8 h. All cells incubated with samples at a same substrate concentration (DOX= 10  $\mu$ g/mL, RhB123=10  $\mu$ g/mL).

As shown in Figure S10, low intracellular RhB123 fluorescent intensity was observed in RhB123&free DOX-incubated cells, attributing to the inherently resistant to RhB123. Moreover, compared to RhB123&free DOX-incubated cells, high RhB123 fluorescent intensity could be observed in RhB123&DOX-BP NPs-incubated cells, and highest RhB123 fluorescent intensity could be observed in RhB123&DOX-BP3-incubated cells. These results revealed that the increase in size of DOX-BP NPs is able to increase the intracellular accumulation of other P-gp substrate (RhB 123), which is consistent with our conclusion.

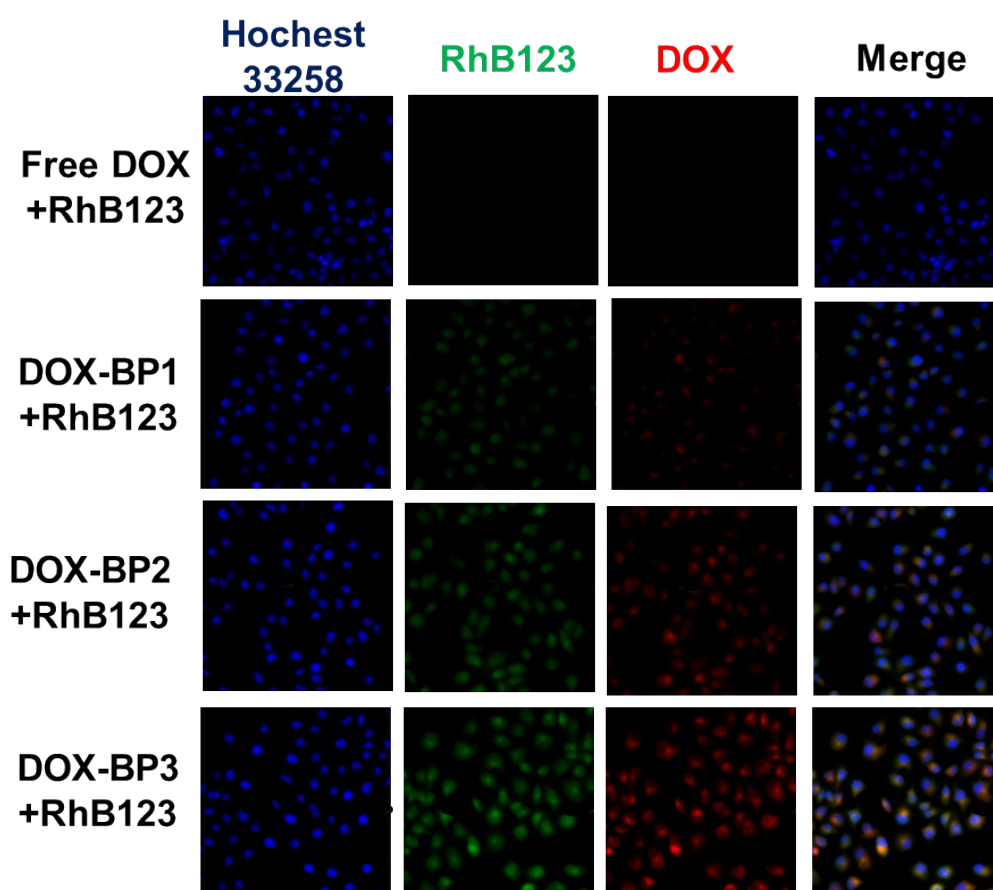

Figure S11. Fluorescence images of MCF-7/ADR cells after co-incubated with RhB123&free DOX or RhB&different sizes DOX-BP NPs for 8 h. Green fluorescence: RhB123. Scale bars: 30  $\mu$ m. All cells incubated with samples at a same substrate concentration (DOX= 10  $\mu$ g/mL, RhB123=10  $\mu$ g/mL).

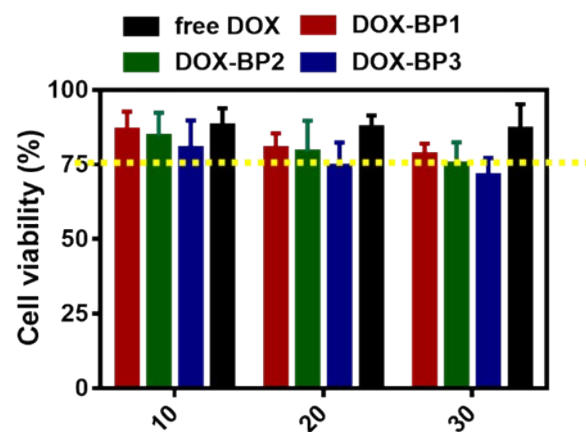

**Figure S12:** Cell viability of MCF-7/ADR cells treated with DOX-BP1, DOX-BP2, DOX-BP3 and free DOX (10, 20 and 30 µg/mL, DOX concentration) for 24 h.

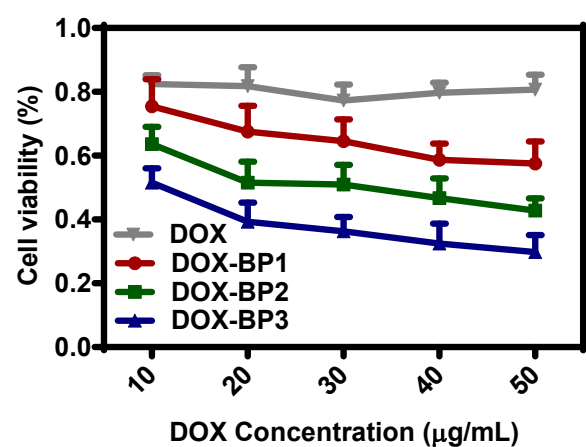

**Figure S13:** Cell viability of MCF-7/ADR cells treated with DOX-BP1, DOX-BP2, DOX-BP3 and free DOX (10, 20, 30, 40 and 50 µg/mL, DOX concentration) for 72 h.

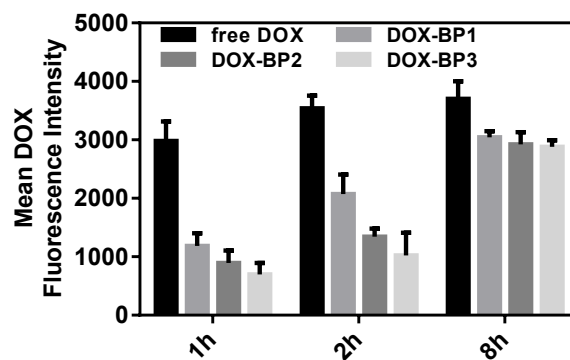

Figure S14: Corresponding fluorescence intensity in MCF-7 cells treatment with free DOX and varisized DOX-BP NPs for 8 h. All cells incubated with samples at a same drug concentration (DOX= 2  $\mu\text{g/mL}$ ).

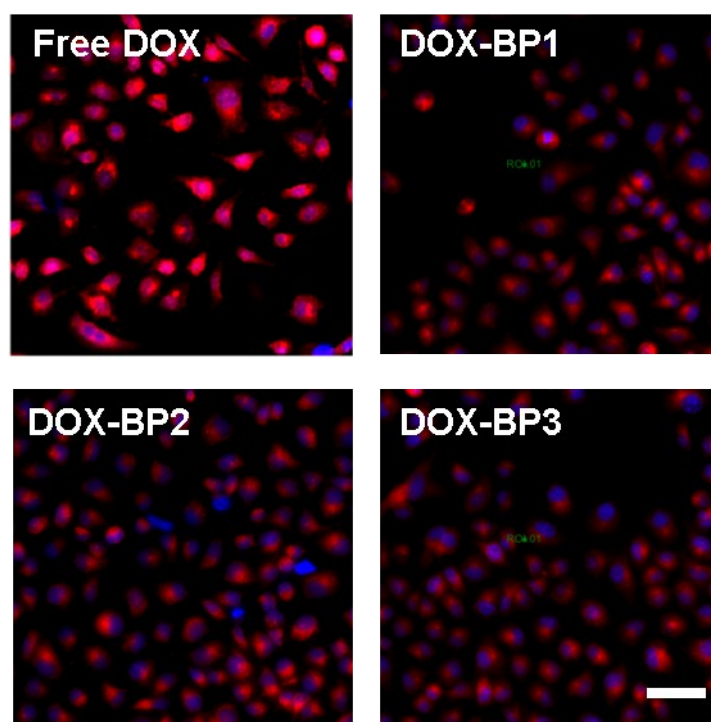

Figure S15: Fluorescence images of MCF-7 cells treatment with free DOX and varisized DOX-BP NPs for 8 h. All cells incubated with samples at a same drug concentration (DOX= 2  $\mu\text{g/mL}$ ). Red fluorecence: DOX. Scale bars: 30 mm.

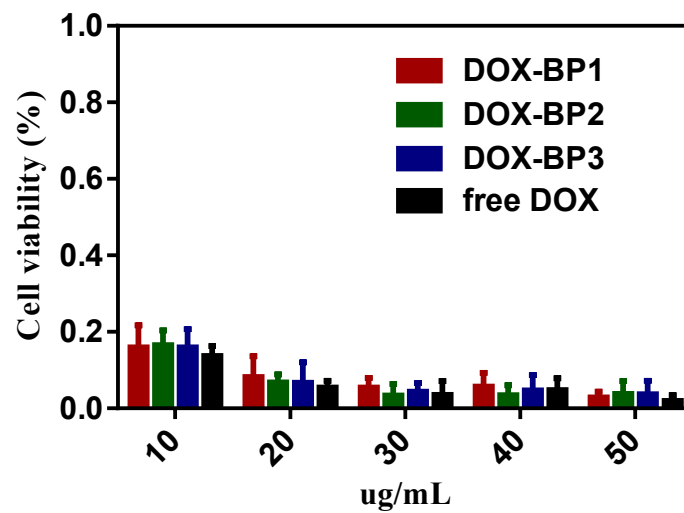

Figure S16: Cell viability of MCF-7 cells treated with DOX-BP1, DOX-BP2, DOX-BP3 and free DOX (10, 20, 30, 40 and 50 µg/mL, DOX concentration) for 24 h.

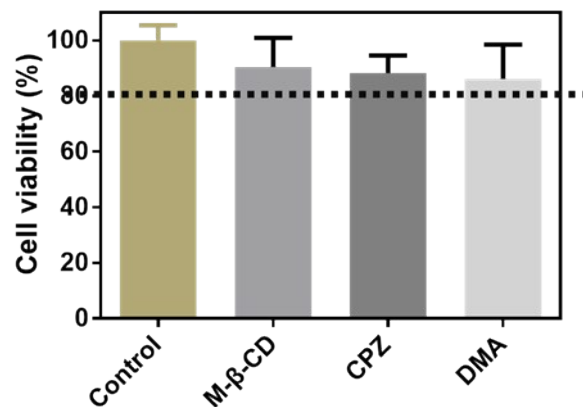

Figure S17: Cell viability of MCF-7/ADR cells treated with (Control: none, M-β-CD: 5 mg/mL, CPZ: 20 µg/mL, DMA: 10 µg/mL) for 4 h. Results are presented as mean ± SD (n=6).

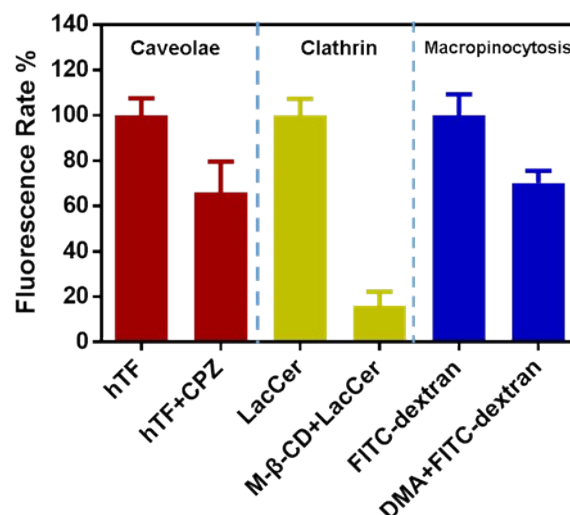

Figure S18: Fluorescence intensity of different inhibitory markers with cells that incubated with or without different specific inhibitor for 1 h. Inhibitory efficiency was investigated using fluorescently labeled endocytic markers, which are molecules known to be exclusively internalized via specific endocytic pathways. (lactosylceramide (LacCer) for clathrin-mediated endocytosis, human transferrin (hTF) for caveolae-mediated endocytosis and FITC-dextran for macropinocytosis.

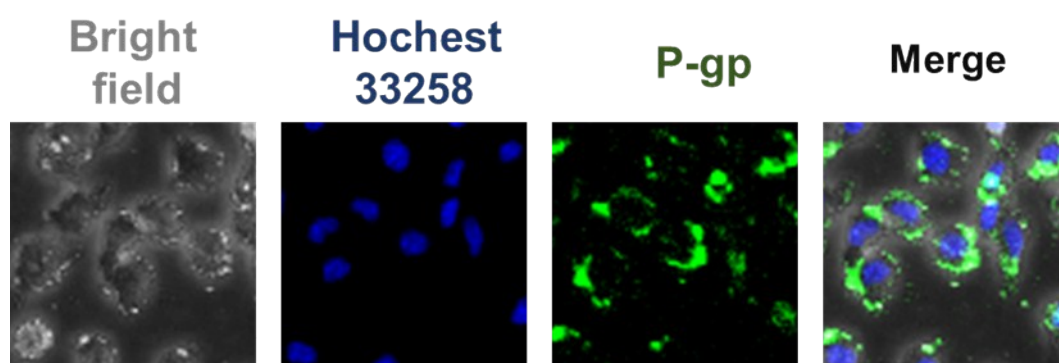

**Figure S19.** Fluorescence images of UIC2 labeling on surface P-gp of untreated MCF-7/ADR cells. Merge image shown the asymmetrical distribution of P-gp.
